# Supplementary material
Source: publisher figshare collection journal article supplement (https://gsapubs.figshare.com/ndownloader/files/23031173)
Supplement: Supplementary file 1 [file 23031173]

## **SITE IDENTIFICATION**

Paleochannel sites identified in Lindgren (1911) were located on georeferenced 1:125,000 geologic maps that were imported into Google Earth<sup>TM</sup> to obtain the geographic coordinates (WGS 84) of each mine. These maps are the ‘Economic Geology’ sheets for the following regions: Bidwell Bar (Turner, 1898), Downieville (Gannett, 1897), Smartsville (Lindgren and Turner, 1895), Colfax (Gannett, 1900), Truckee (Lindgren, 1897), Sacramento (Becker and Lindgren, 1893), Placerville (Lindgren and Turner, 1894), and Pyramid Peak (Hoover and Lindgren, 1896). The U.S.G.S. mineral resources database (<https://mrdata.usgs.gov/mrds/>) was also used to confirm the approximate location of some of the mine sites (i.e., within 500 m, according to the website).

## **ERROR ANALYSIS**

The results presented in this study depend critically on the accuracy of the elevation measurements. Although most of the paleochannel sites are presently inaccessible, the elevations of three sites with particularly low-lying surficial deposits were confirmed during field visits: Indian Hill (Hietanen, 1976), Spring Creek (Saucedo and Wagner, 1992; Yeend, 1974), and Pacific House (N) (Lindgren and Turner, 1894) (Fig. S2). The elevation and geographical coordinates of these deposits, as well as both sites with volcanic rocks, were recorded with a handheld Garmin 400 GPS. The coordinates were used to retrieve the elevation from 1/3-arcsecond (~10-m) DEMs, which have a standard deviation for elevations of  $\pm 2.4$  m (Haneberg, 2006; Survey, 2019). Although the GPS typically reported an uncertainty of 4-5 m, elevations measured by the GPS never differed from the DEM elevations by more than 2 m; therefore, we used the elevations from the DEMs and adopt 2.4 m as the uncertainty for these measurements.

The paleochannel elevations presented in Lindgren (1911) were measured with aneroid barometers, which are accurate to within 2 m when properly calibrated and with stable atmospheric pressures (Hamilton et al., 1957). However, these conditions appear to have been difficult to meet at times; for example, Lindgren’s fieldbooks (1886) record fluctuations in barometer measurements of up to 15 m for the same location over the

course of a day. We conservatively take this value as the 1- $\sigma$  error for the paleochannel elevations in Lindgren (1911). We do not account for any measurement errors that might have been caused by variations in temperature or pressure within the mines; given that the mines were generally not very long or deep, these errors are likely small. Note, also, that because the datum used for regional elevations has been updated since Lindgren (1911), the actual paleochannel elevations from the mines may be up to 8 m higher (C. Jones, pers. comm.), implying a potential systematic underestimate of the incision values by the same amount.

For the elevations of the modern river beds, there are two sources of uncertainty; the first is associated with the uncertainty in drawing the ray from paleochannel site to the correct location on the modern river. While the GIS software used, ARCGIS<sup>TM</sup>, allows lines to be drawn at specified angles, meanders in the river planform introduce some uncertainty in determining the appropriate intersection point. Based on an average meander wavelength ( $\sim 500$  m) and an average river gradient ( $\sim 1$  %), we estimate this source of error in the modern bed elevation to be  $\pm 5$  m. The second source of error is the inherent uncertainty associated with DEMs; as noted above, the standard deviation for elevations in a 1/3-arcsecond ( $\sim 10$ -m) DEM is  $\pm 2.4$  m (Haneberg, 2006; U.S.G.S., 2019). In a few locations (e.g., the North Fork Stanislaus River site), the bedrock river beds are presently under reservoirs; in these cases, the channel elevation was determined from pre-dam 1:24000 topographic maps. Additionally, in a few locations where the valley was deeply alluviated (i.e., Thistle Tunnel, Thistle Shaft, Sicard Flat), the slopes of the bedrock valley walls were extrapolated to estimate the elevation of the canyon bottoms.

Finally, the DEMs provide water surface elevations, rather than bed elevations. Because bedrock channels in the DEMs for the northern Sierra typically only have a width of one pixel (i.e.,  $\sim 10$  m), the data used to construct the DEMs appear to have been taken during low-flow conditions which, according to our field observations, would suggest average flow depths of  $\sim 1$  m. Therefore, to account for the discrepancy between the channel elevations from the DEMs and the bed elevations, we subtracted 1 m from the former. Standard techniques (Robinson, 2016) were then used to propagate uncertainties in the elevations of the modern river bed, along with the uncertainty in the

elevations of the paleochannels, to yield a combined uncertainty of  $\pm 6$  m for the incision depths for the sites that we visited and  $\pm 16$  m for the inaccessible mining sites.

## **DATING OF ANDESITIC VOLCANIC DEPOSIT**

The groundmass age ( $6.48 \pm 0.01$  Ma) of an andesitic volcanic deposit along the South Fork American River at the Twin Bridges site (Fig. 1D) was determined with  $^{40}\text{Ar}/^{39}\text{Ar}$  using 28.201 Ma for the FCT-NM standard (Kuiper et al., 2008); the analysis was performed at the Argon Geochronology Laboratory at Oregon State University by incremental heating using a Synrad  $\text{CO}_2$  laser. Specific details about the analysis and the release spectra can be found on the last page of this section.

## REFERENCES

- Becker, F., and Lindgren, W., 1893, Sacramento Economic Geology Sheet, U.S. Geological Survey, 1:125,000.
- Gannett, H., 1897, Downieville Economic Geology Sheet, U.S. Geological Survey, 1:125,000.
- Gannett, H., 1900, Colfax Economic Geology Sheet, U.S. Geological Survey, 1:125,000.
- Hamilton, R.A., Biddle, C.A., and Sparks, B.W., 1957, Surveying aneroids: their uses and limitations: *The Geographical Journal*, v. 123, p. 481-489.
- Haneberg, W.C., 2006, Effects of digital elevation model errors on spatially distributed seismic slope stability calculations: An example from Seattle, Washington: *Environmental & Engineering Geoscience*, v. 12, p. 247-260.
- Hietanen, A., 1976, Metamorphism and plutonism around the Middle and South Forks of the Feather River, California: U.S. Geological Survey Professional Paper 920, p. 30.
- Hoover, H.C., and Lindgren, W., 1896, Pyramid Peak Economic Geology Sheet, U.S. Geological Survey, 1:125,000.
- Kuiper, K.F., Deino, A., Krijgsam, W., Renne, P.R., and Wijbrans, J.R., 2008, Synchronizing rock clocks of Earth history: *Science*, v. 320, p. 500-504.
- Lindgren, W., 1886, Preliminary Survey of Gold Belt: United States Geological Survey, Geologic Records, U.S. Geological Survey, Denver, Accession No. 12302.
- Lindgren, W., 1897, Truckee Economic Geology Sheet, U.S. Geological Survey, 1:125,000.
- Lindgren, W., 1911, The Tertiary gravels of the Sierra Nevada of California: U.S. Geological Survey Professional Paper 73.
- Lindgren, W., and Turner, H.W., 1894, Placerville Economic Geology Sheet, U.S. Geological Survey, 1:125,000.
- Lindgren, W., and Turner, H.W., 1895, Smartsville Economic Geology Sheet, U.S. Geological Survey, 1:125,000.
- Robinson, E.L., 2016, *Data Analysis for Scientists and Engineers*: Princeton, New Jersey, Princeton University Press, 408 p.
- Saucedo, G.J., and Wagner, D.L., 1992, Geologic map of the Chico quadrangle, California, Division of Mines and Geology, 1:250,000.
- U.S.G.S., 2019, National Elevation Dataset, U.S. Geological Survey, 1:24000.
- Turner, H.W., 1898, Bidwell Bar Economic Geology Sheet, U.S. Geological Survey, 1:125,000.
- Yeend, W.E., 1974, Gold-bearing gravel of the ancestral Yuba River, Sierra Nevada, California: U.S.G.S Professional Paper 772, p. 1-44.
- Yeend, W.E., and Peterson, D.W., 1974, Geologic Map of Tertiary Gold-Bearing Gravel, Sierra, Nevada, and Placer Counties, California in U.S. Geological Survey Professional Paper 772, U.S. Government Printing Office, 1:62500.

**EXP#18E31404 > TB1 > Groundmass > GOBET (18-10)**  
**S FORK AMERICAN RIVER > TWIN BRIDGES**  
**18-OSU-06 (6E20-18) > Incremental Heating > Dan Miggins**

**Information on Analysis  
and Constants Used in Calculations**

Project = **GOBET (18-10)**  
Sample = **TB1**  
Material = **Groundmass**  
Location = **Twin Bridges**  
Region = **S Fork American River**  
Analyst = **Dan Miggins**  
Irradiation = **18-OSU-06 (6E20-18)**  
Position = X: 999 | Y: 999 | Z/H: 25.29056 mm  
FCT-NM Age = **28.201 ± 0.023 Ma**  
FCT-NM Reference = **Kuiper et al (2008)**  
FCT-NM 40Ar/39Ar Ratio = **9.83636 ± 0.00846**  
FCT-NM J-value = **0.00159789 ± 0.00000137**  
Air Shot 40Ar/36Ar = **307.5990 ± 0.3138**  
Air Shot MDF = **0.99015387 ± 0.00062047 (LIN)**  
Experiment Type = **Incremental Heating**  
Extraction Method = **Bulk Laser Heating**  
Heating = **55 sec**  
Isolation = **5.10 min**  
Instrument = **ARGUS-VI-E**  
Preferred Age = **Total Fusion**  
Age Classification = **Crystallization Age**  
IGSN = **Undefined**  
Rock Class = **Undefined**  
Lithology = **Undefined**  
Lat-Lon = **Undefined - Undefined**  
Age Equations = **Min et al. (2000)**  
Negative Intensities = **Allowed**  
Collector Calibrations = **36Ar**  
Decay 40K = **5.530 ± 0.048 E-10 1/a**  
Decay 39Ar = **2.940 ± 0.016 E-07 1/h**  
Decay 37Ar = **8.230 ± 0.012 E-04 1/h**  
Decay 36Cl = **2.257 ± 0.015 E-06 1/a**  
Decay 40K(EC,β<sup>+</sup>) = **0.580 ± 0.009 E-10 1/a**  
Decay 40K(β<sup>-</sup>) = **4.950 ± 0.043 E-10 1/a**  
Atmospheric 40/36(a) = **295.50**  
Atmospheric 38/36(a) = **0.1869**  
Production 39/37(ca) = **0.0006425 ± 0.0000059**  
Production 38/37(ca) = **0.0001800 ± 0.0000173**  
Production 36/37(ca) = **0.0002703 ± 0.0000005**  
Production 40/39(k) = **0.000607 ± 0.000059**  
Production 38/39(k) = **0.012077 ± 0.000011**  
Production 36/38(cl) = **262.80 ± 1.71**  
Scaling Ratio K/Ca = **0.430**  
Abundance Ratio 40K/K = **1.1700 ± 0.0100 E-04**  
Atomic Weight K = **39.0983 ± 0.0001 g**

**Results**

|                  | 40(a)/36(a) ± 2σ | 40(r)/39(k) ± 2σ             | Age ± 2σ<br>(Ma)                                      | MSWD | 39Ar(k)<br>(%,n) | K/Ca ± 2σ     |
|------------------|------------------|------------------------------|-------------------------------------------------------|------|------------------|---------------|
| Age Plateau      |                  |                              |                                                       |      |                  |               |
| Cannot Calculate |                  |                              |                                                       |      |                  |               |
| Total Fusion Age |                  | 2.24652 ± 0.00137<br>± 0.06% | 6.48 ± 0.01<br>± 0.18%                                |      | 35               | 0.502 ± 0.000 |
|                  |                  |                              | Full External Error ± 0.15<br>Analytical Error ± 0.00 |      |                  |               |
| Normal Isochron  |                  |                              |                                                       |      |                  |               |
| Inverse Isochron |                  |                              |                                                       |      |                  |               |
| Cannot Calculate |                  |                              |                                                       |      |                  |               |

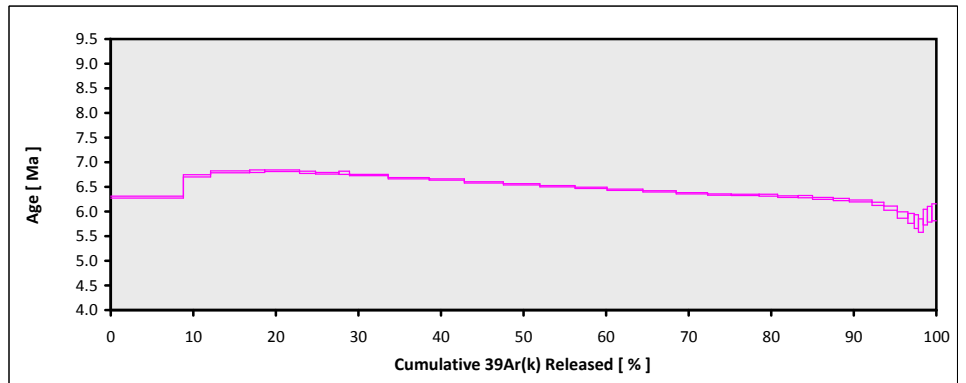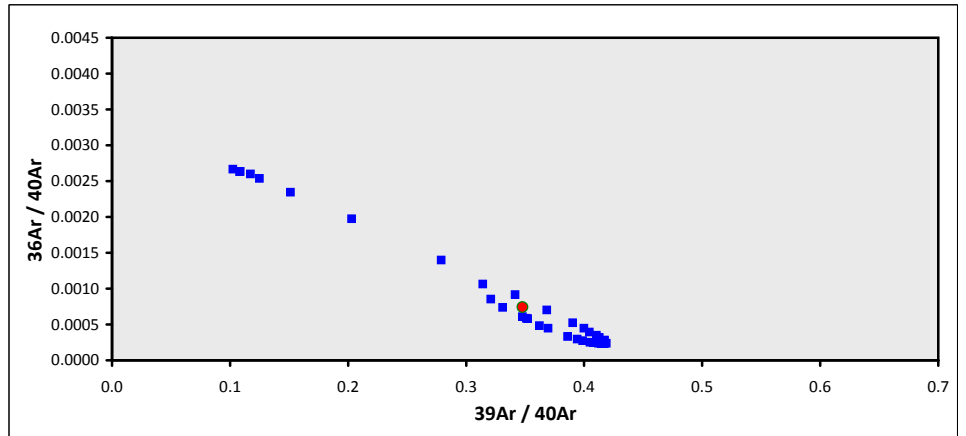

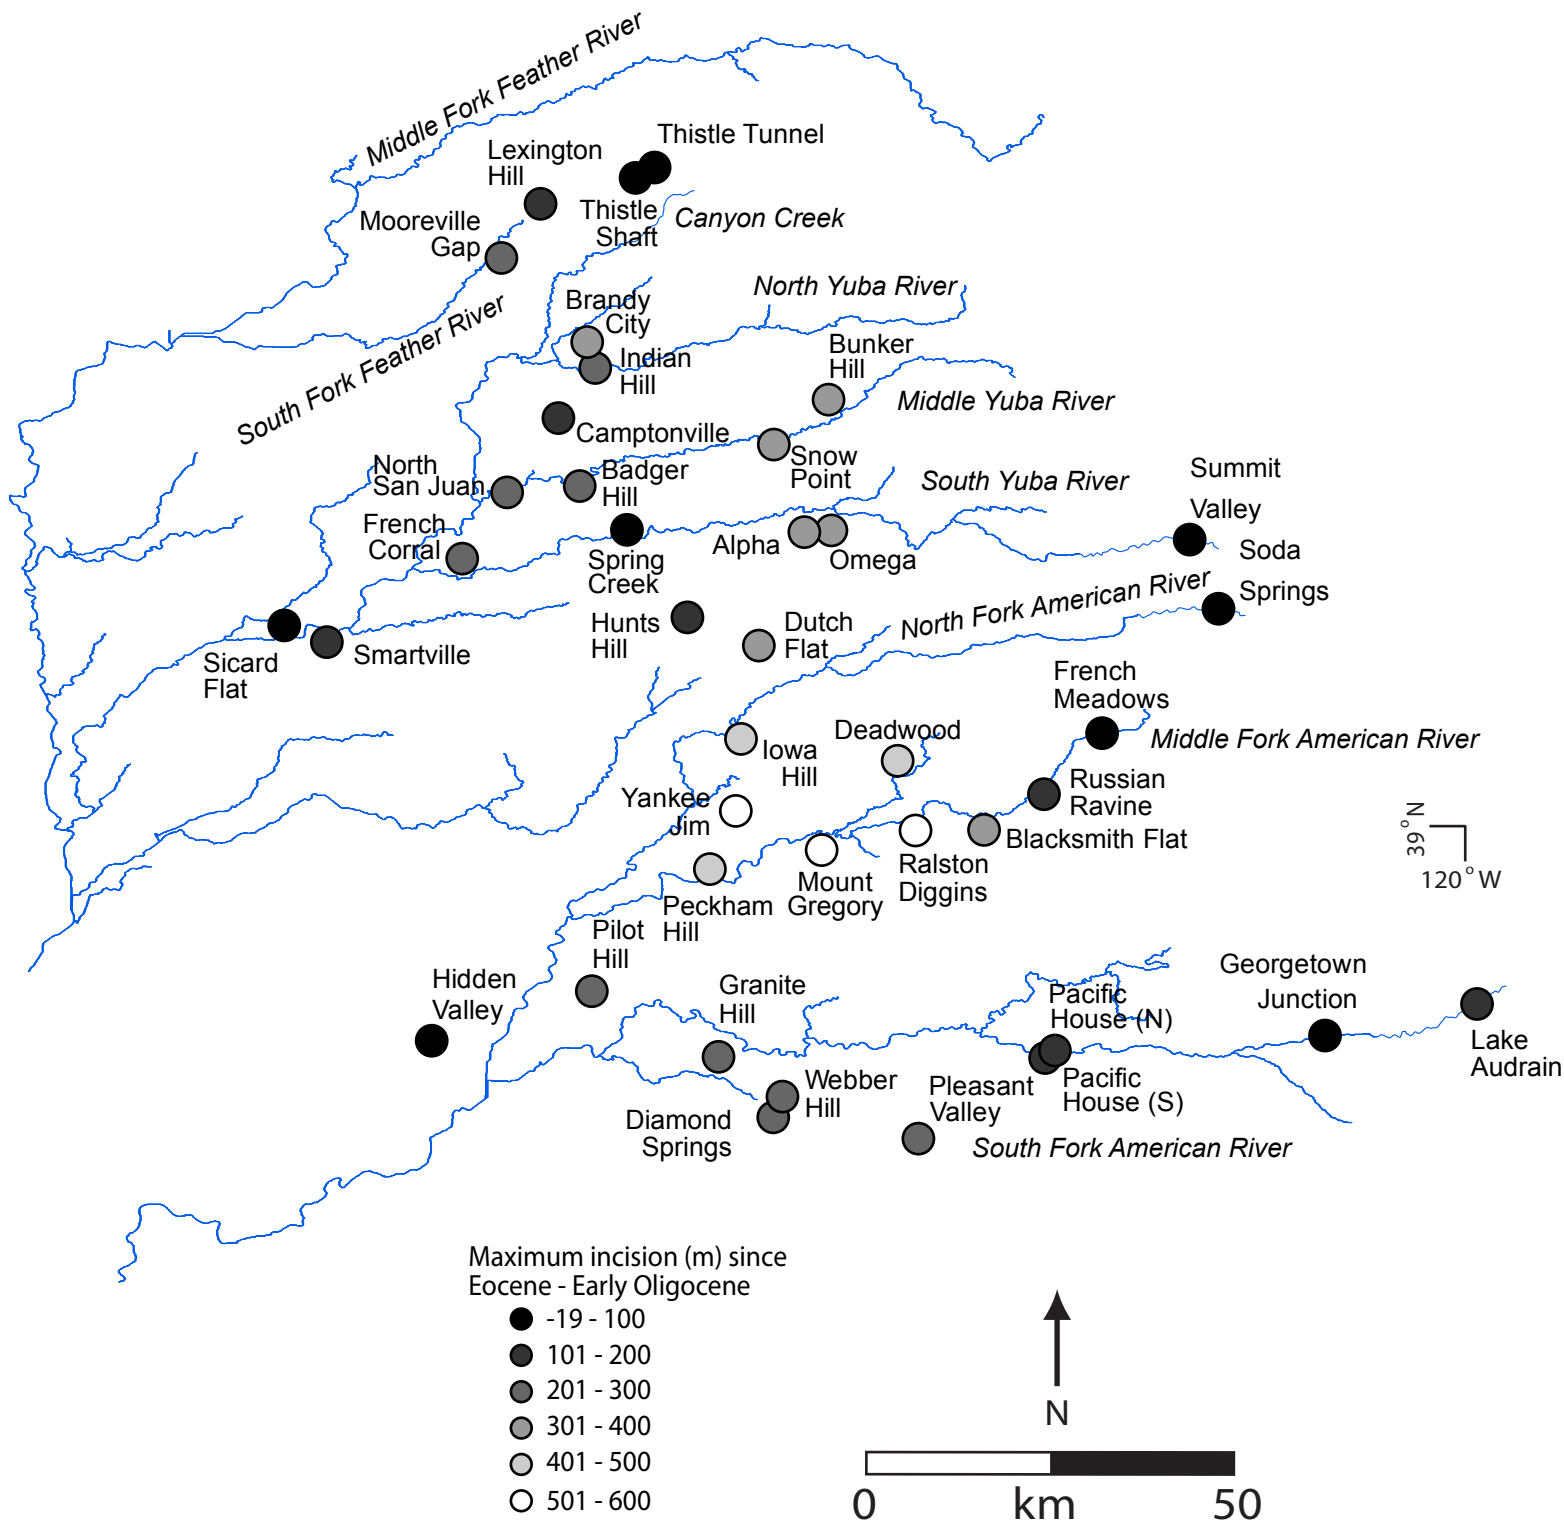

Fig. S1. Locations and names of mining sites with paleochannel data. Geographical coordinates and related information provided in Table S1.

TABLE S1. PALEOCHANNEL INFORMATION

| Site Name       | Lat.<br>(dec. deg.) | Long.<br>(dec. deg.) | Paleo-<br>channel<br>elev. (m) | Modern<br>river | Lat.<br>(dec. deg.) | Long.<br>(dec. deg.) | Modern<br>bed<br>elev. (m) | Incision<br>(m) | Paleochannel elev. source,<br>page no. * |
|-----------------|---------------------|----------------------|--------------------------------|-----------------|---------------------|----------------------|----------------------------|-----------------|------------------------------------------|
| Alpha           | 39.335              | -120.782             | 1174                           | S Yuba          | 39.360              | -120.793             | 791                        | 383             | (Lindgren, 1911), 147                    |
| Badger Hill     | 39.380              | -121.031             | 729                            | Mdl Yuba        | 39.389              | -121.032             | 519                        | 210             | (Lindgren, 1911), Plate X                |
| Blacksmith Flat | 39.010              | -120.585             | 1158                           | Mdl Fk Am       | 39.028              | -120.592             | 783                        | 375             | (Lindgren, 1911), Plate X                |
| Brandy City     | 39.544              | -121.024             | 1067                           | N Yuba          | 39.519              | -121.007             | 683                        | 384             | (Lindgren, 1911), 100                    |
| Bunker Hill     | 39.478              | -120.758             | 1440                           | Mdl Yuba        | 39.459              | -120.746             | 1056                       | 384             | (Lindgren, 1911), 142                    |
| Camptonville    | 39.467              | -121.059             | 810                            | N Yuba          | 39.519              | -121.076             | 615                        | 195             | (Lindgren, 1911), 100                    |
| Deadwood        | 39.085              | -120.680             | 1130                           | Mdl Fk Am       | 39.070              | -120.672             | 651                        | 479             | (Lindgren, 1911), 158                    |
| Diamond Springs | 38.696              | -120.816             | 542                            | S Fk Am         | 38.770              | -120.850             | 269                        | 273             | (Lindgren, 1911), 170                    |
| Dutch Flat      | 39.211              | -120.835             | 868                            | N Fk Am         | 39.167              | -120.810             | 510                        | 358             | (Lindgren, 1911), Plate X                |
| French Corral   | 39.306              | -121.155             | 481                            | S Yuba          | 39.289              | -121.144             | 258                        | 223             | (Lindgren, 1911), Plate X                |
| French Meadows  | 39.116              | -120.457             | 1539                           | Mdl Fk Am       | 39.114              | -120.457             | 1519                       | 20              | (Lindgren, 1911), Plate X                |
| Georgetown Jctn | 38.785              | -120.214             | 1646                           | S Fk Am         | 38.783              | -120.213             | 1560                       | 86              | (Lindgren, 1911), Plate X                |
| Granite Hill    | 38.765              | -120.880             | 503                            | S Fk Am         | 38.814              | -120.901             | 221                        | 282             | (Lindgren, 1911), 171                    |
| Hidden Valley   | 38.780              | -121.188             | 112                            | N Fk Am         | 38.712              | -121.152             | 82                         | 30              | (Becker and Lindgren, 1893)              |
| Hunts Hill      | 39.241              | -120.909             | 799                            | S Yuba          | 39.337              | -120.953             | 618                        | 181             | (Lindgren, 1911), Plate X                |
| Indian Hill     | 39.513              | -121.010             | 914                            | N Yuba          | 39.516              | -121.012             | 681                        | 233             | (Hietanen, 1976)                         |
| Iowa Hill       | 39.120              | -120.841             | 802                            | N Fk Am         | 39.132              | -120.861             | 401                        | 401             | (Lindgren, 1911), 148                    |
| Lake Audrain    | 38.821              | -120.049             | 2286                           | S Fk Am         | 38.824              | -120.051             | 2099                       | 187             | (Lindgren, 1911), Plate X                |
| Lexington Hill  | 39.693              | -121.069             | 1433                           | S Fk FR         | 39.686              | -121.067             | 1242                       | 191             | (Turner, 1898)                           |
| Mooreville Gap  | 39.633              | -121.112             | 1295                           | S Fk FR         | 39.644              | -121.116             | 1055                       | 240             | (Saucedo and Wagner, 1992)               |
| Mount Gregory   | 38.988              | -120.763             | 869                            | Mdl Fk Am       | 39.006              | -120.771             | 305                        | 564             | (Lindgren, 1911), 169                    |
| North San Juan  | 39.373              | -121.112             | 620                            | Mdl Yuba        | 39.381              | -121.107             | 407                        | 213             | (Lindgren, 1911), Plate X                |
| Omega           | 39.336              | -120.752             | 1228                           | S Yuba          | 39.359              | -120.763             | 846                        | 382             | (Lindgren, 1911), 147                    |
| Pacific House N | 38.769              | -120.508             | 1052                           | S Fk Am         | 38.763              | -120.505             | 891                        | 161             | (Lindgren and Turner, 1894)              |
| Pacific House S | 38.761              | -120.519             | 1036                           | S Fk Am         | 38.767              | -120.522             | 875                        | 161             | (Lindgren, 1911), Plate X                |
| Peckham Hill    | 38.967              | -120.885             | 665                            | Mdl Fk Am       | 38.957              | -120.883             | 237                        | 428             | (Lindgren, 1911), 169                    |
| Pilot Hill      | 38.836              | -121.017             | 381                            | S Fk Am         | 38.787              | -120.981             | 170                        | 211             | (Lindgren, 1911), 163                    |
| Pleasant Valley | 38.673              | -120.657             | 753                            | S Fk Am         | 38.772              | -120.703             | 497                        | 256             | (Becker and Lindgren, 1893)              |

| Site Name        | Lat.<br>(dec. deg.) | Long.<br>(dec. deg.) | Paleo-<br>channel<br>elev. (m) | Modern<br>river | Lat.<br>(dec. deg.) | Long.<br>(dec. deg.) | Modern<br>bed<br>elev. (m) | Incision<br>(m) | Paleochannel elev. source,<br>page no. * |
|------------------|---------------------|----------------------|--------------------------------|-----------------|---------------------|----------------------|----------------------------|-----------------|------------------------------------------|
| Ralston Diggings | 39.008              | -120.658             | 1059                           | Mdl Fk Am       | 39.019              | -120.666             | 520                        | 539             | (Lindgren, 1911), 152                    |
| Russian Ravine   | 39.046              | -120.507             | 1356                           | Mdl Fk Am       | 39.057              | -120.524             | 1164                       | 192             | (Lindgren, 1911), Plate X                |
| Sicard Flat      | 39.233              | -121.349             | 91                             | S Yuba          | 39.219              | -121.345             | 50                         | 41              | (Lindgren, 1911), Plate X                |
| Smartville       | 39.214              | -121.302             | 231                            | S Yuba          | 39.218              | -121.304             | 72                         | 155             | (Lindgren, 1911), Plate X                |
| Snow Point       | 39.430              | -120.815             | 1284                           | Mdl Yuba        | 39.434              | -120.818             | 879                        | 405             | (Lindgren, 1911), 141                    |
| Soda Springs     | 39.251              | -120.330             | 1890                           | N Fk Am         | 39.247              | -120.327             | 1816                       | 74              | (Lindgren, 1911), Plate X                |
| Spring Creek     | 39.337              | -120.975             | 701                            | S Yuba          | 39.333              | -120.974             | 599                        | 102             | (Yeend and Peterson, 1974)               |
| Summit Valley    | 39.327              | -120.361             | 2073                           | S Yuba          | 39.309              | -120.348             | 2072                       | 1               | (Lindgren, 1911), Plate X                |
| Thistle Shaft    | 39.732              | -120.945             | 1533                           | S Fk FR         | 39.741              | -120.975             | 1474                       | 59              | (Lindgren, 1911), 108                    |
| Thistle Tunnel   | 39.721              | -120.966             | 1457                           | S Fk FR         | 39.741              | -120.974             | 1476                       | -19             | (Lindgren, 1911), 108                    |
| Webber Hill      | 38.720              | -120.802             | 579                            | S Fk Am         | 38.769              | -120.829             | 282                        | 297             | (Lindgren, 1911), 170                    |
| Yankee Jim       | 39.031              | -120.862             | 791                            | Mdl Fk Am       | 38.981              | -120.830             | 262                        | 529             | (Lindgren, 1911), 150                    |

\* page number not provided for map sources
